# Supplementary material for: Exploration of Serum Proteomic Profiling and Diagnostic Model That Differentiate Crohn's Disease and Intestinal Tuberculosis
Source: PubMed Central journal article supplement (PMC5173341; doi:10.1371/journal.pone.0167109), 2016-12-20
Supplement: pone.0167109.s001.pdf [file pone.0167109.s001.pdf]

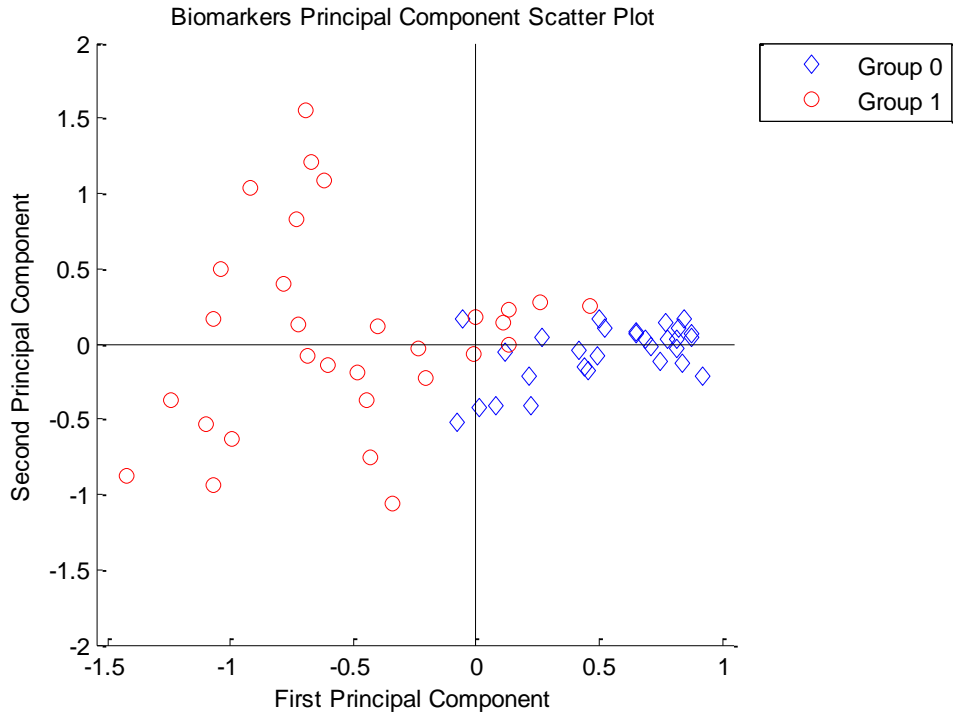

Biomarkers Principal Component Scatter Plot  
Group 1: Crohn's disease patients, group 0: Healthy controls.

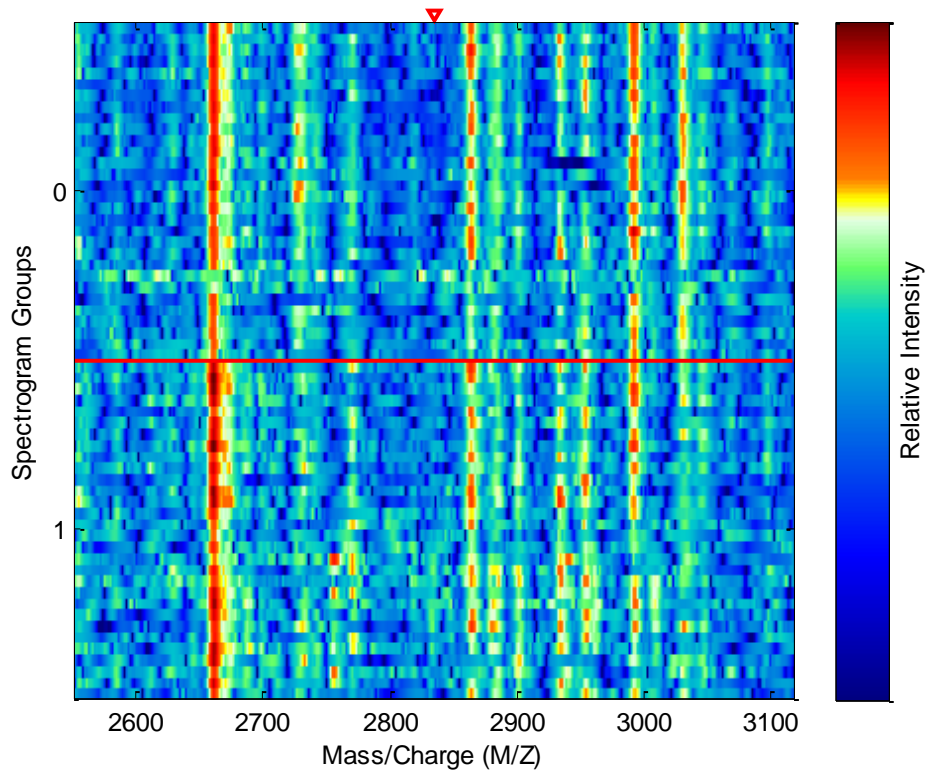

Gel figure: M/Z 2833

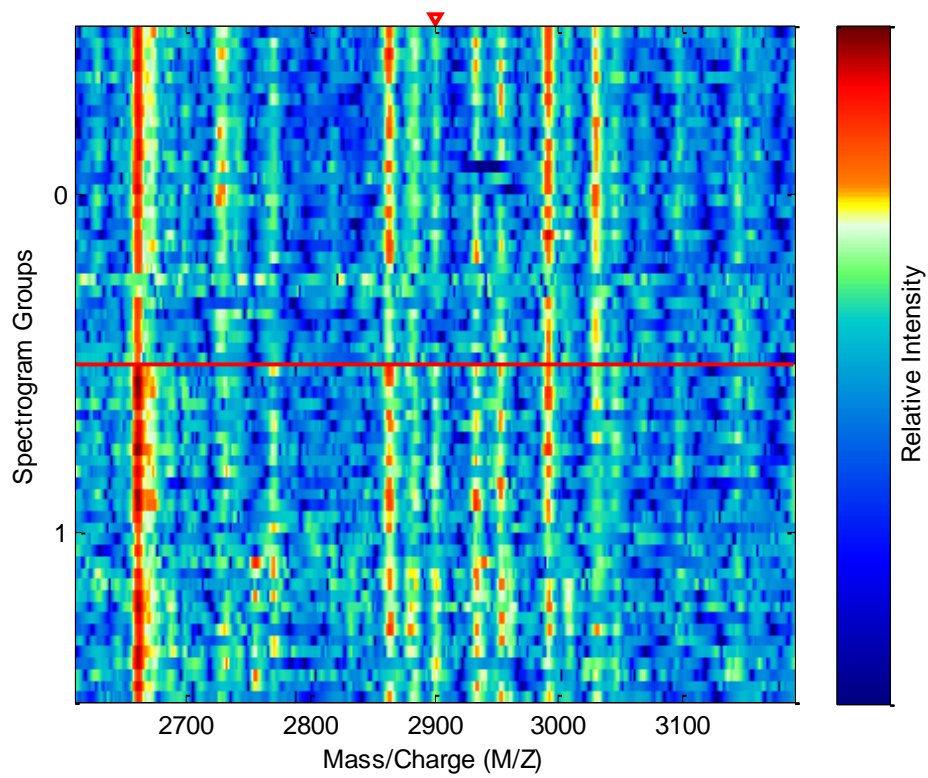

Gel figure: M/Z 2900

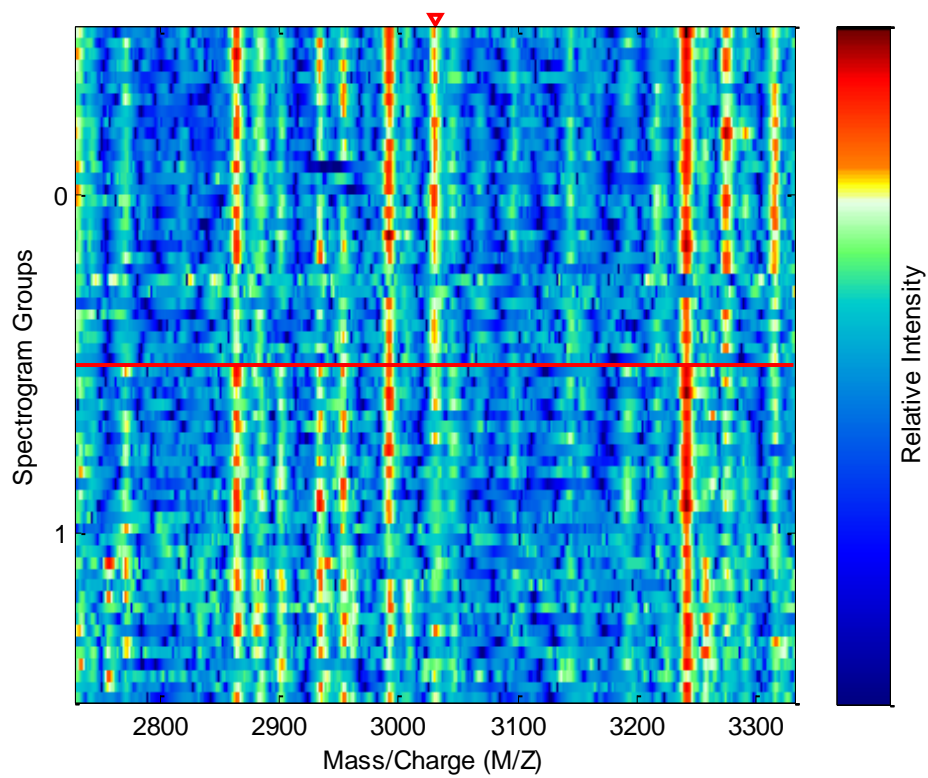

Gel figure: M/Z 3029

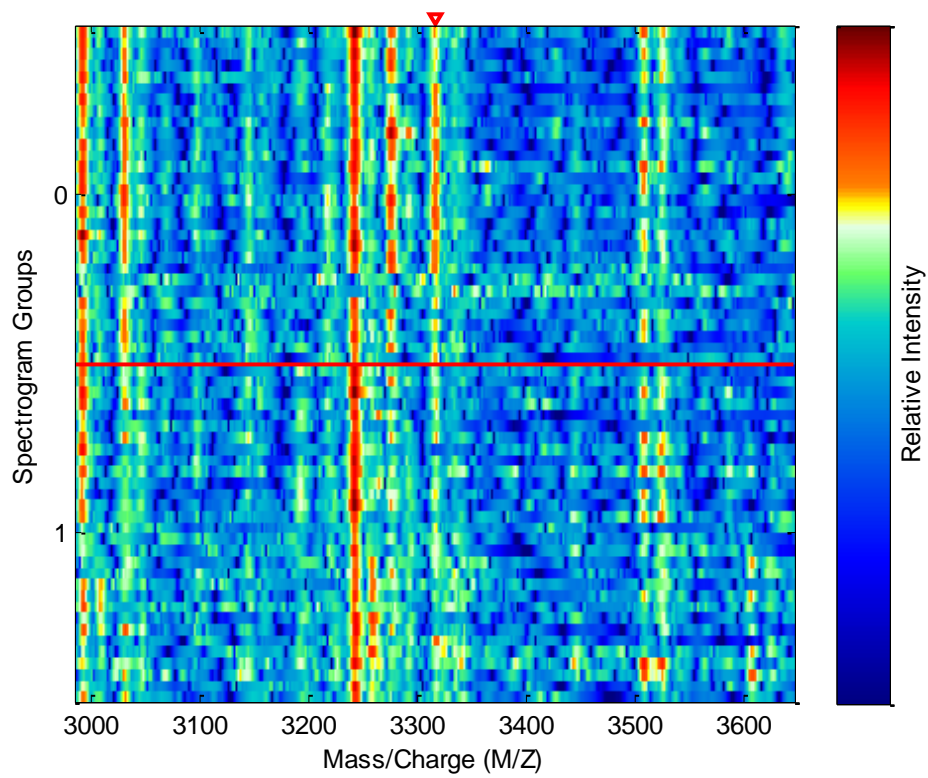

Gel figure: M/Z 3315

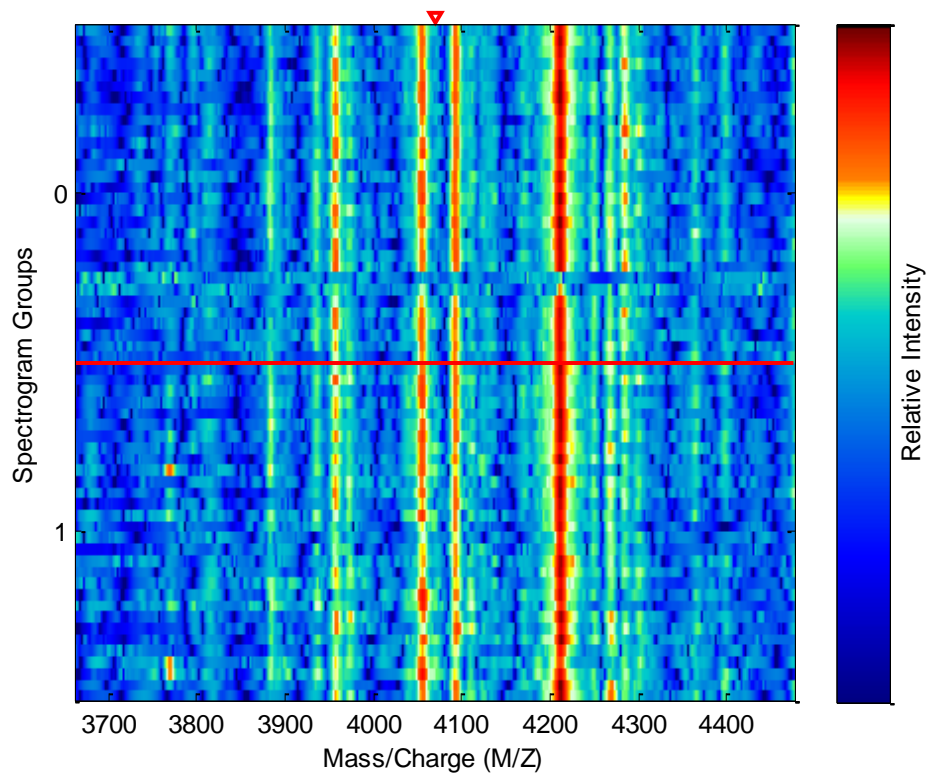

Gel figure: M/Z 4069

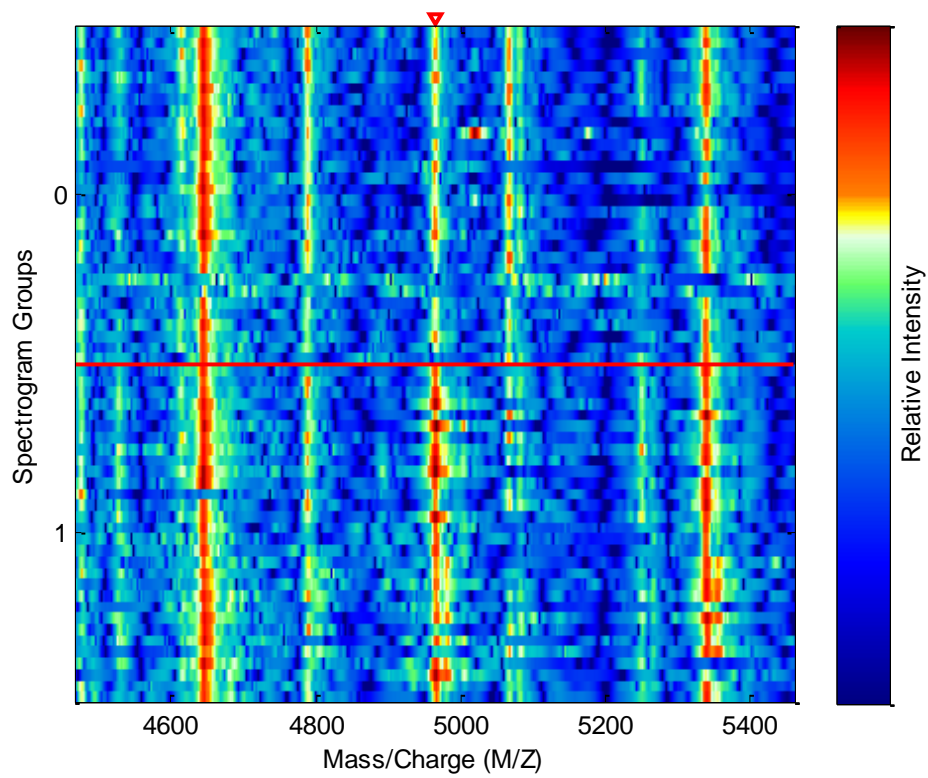

Gel figure: M/Z 4964

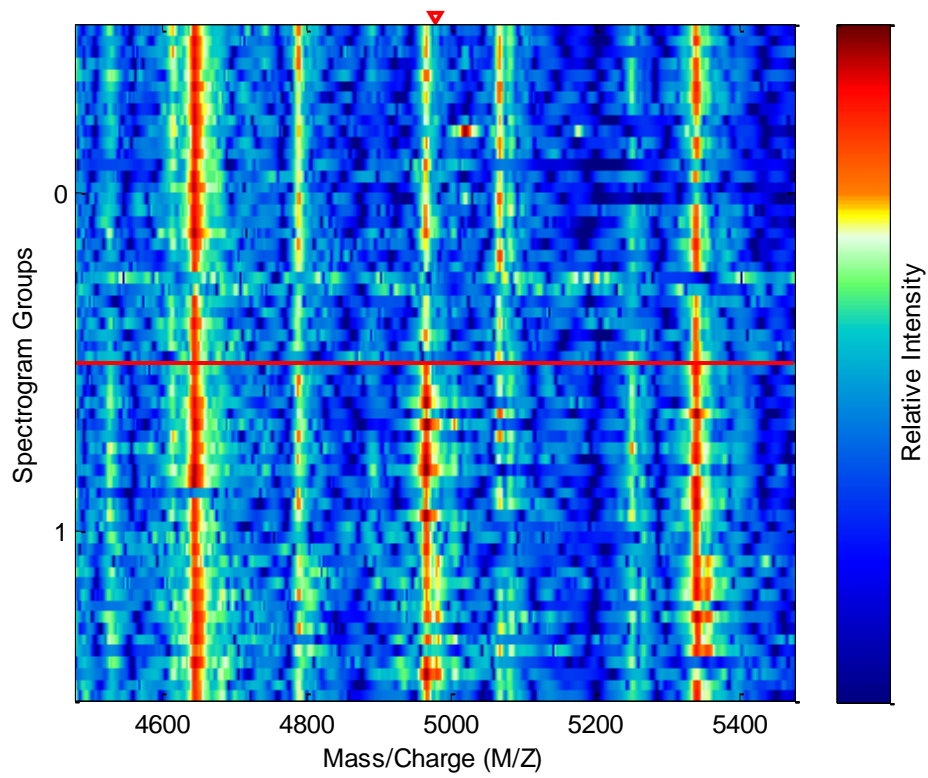

Gel figure: M/Z 4976

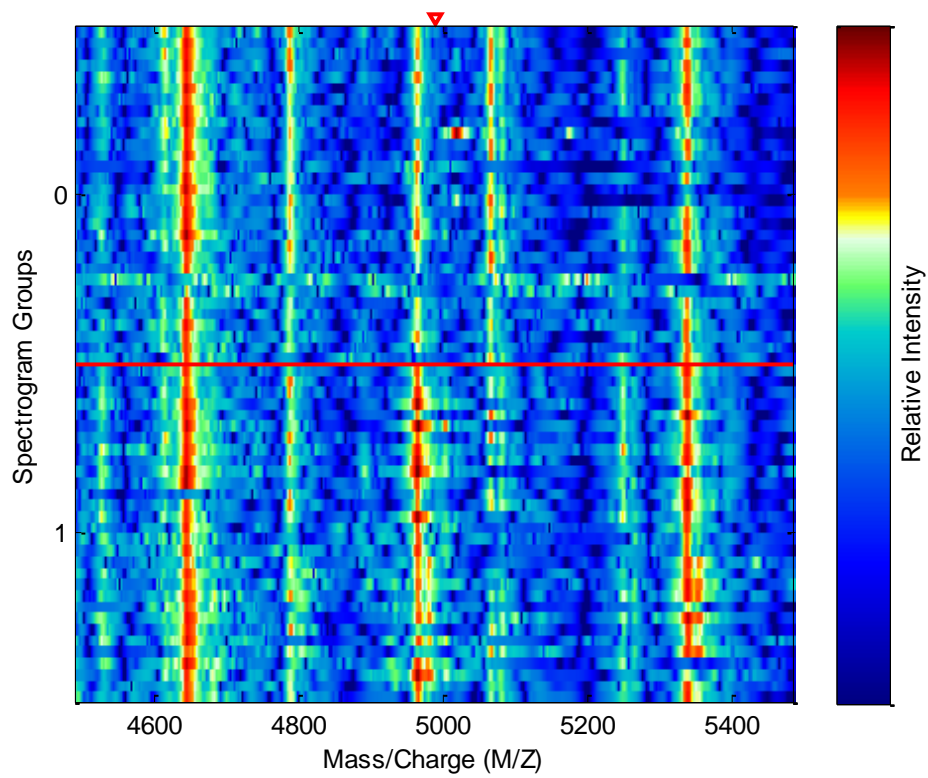

Gel figure: M/Z 4988

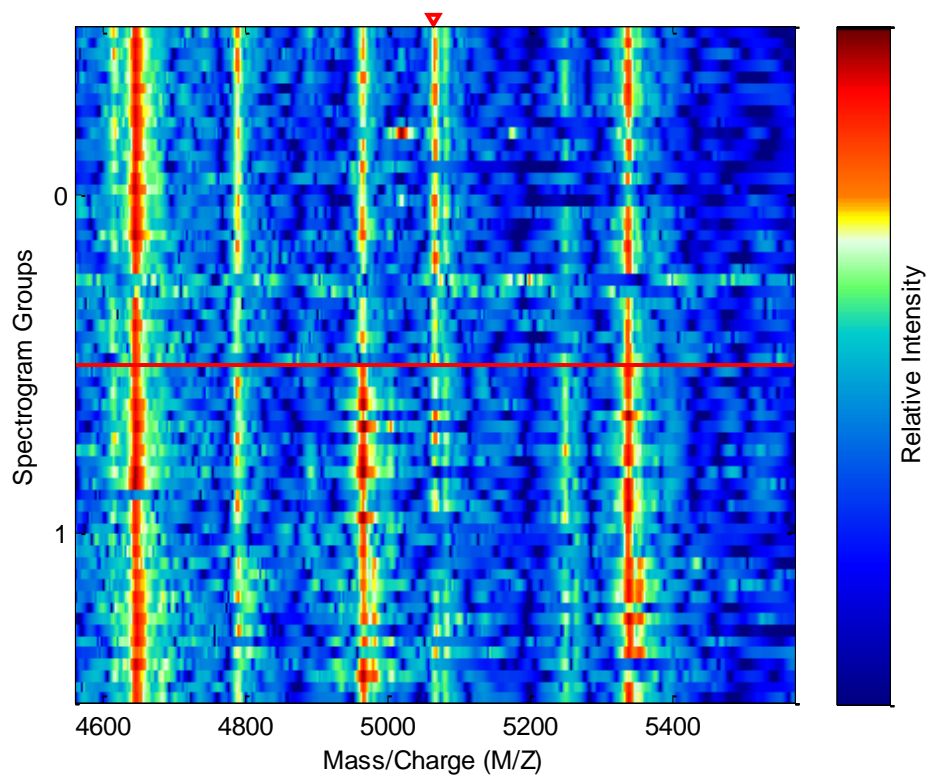

Gel figure: M/Z 5065

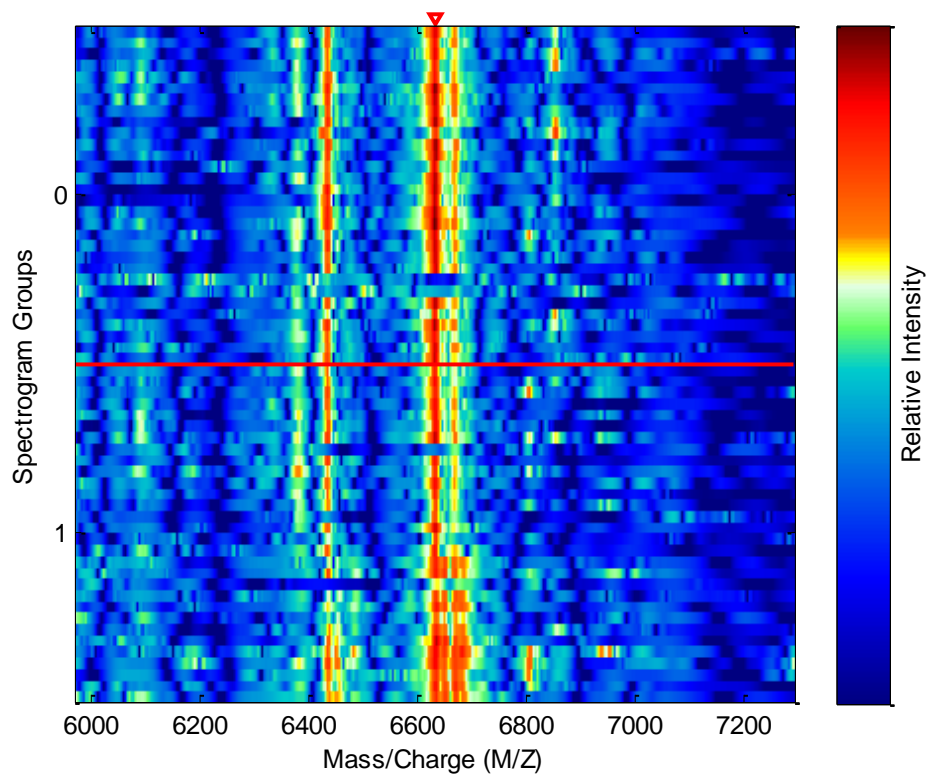

Gel figure: M/Z 6630

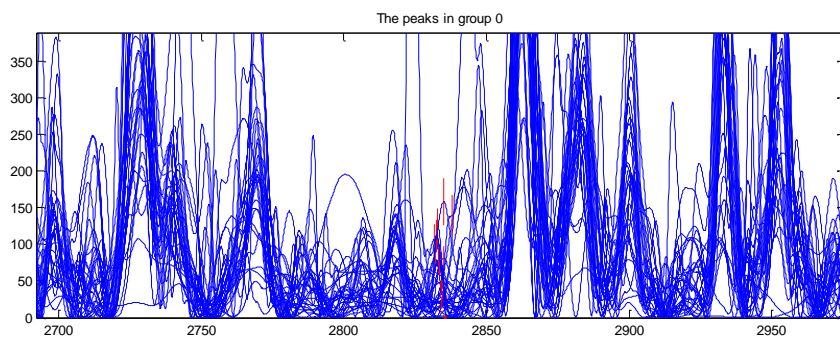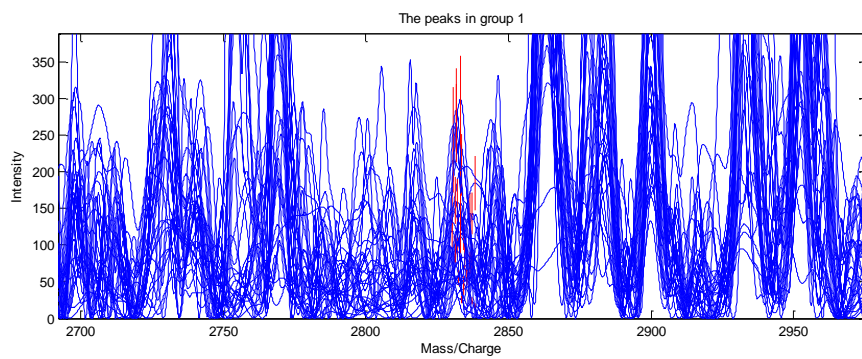

Peak figure: M/Z 2833

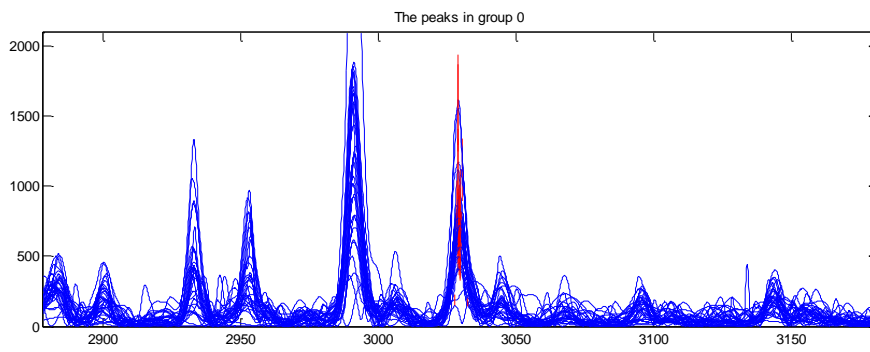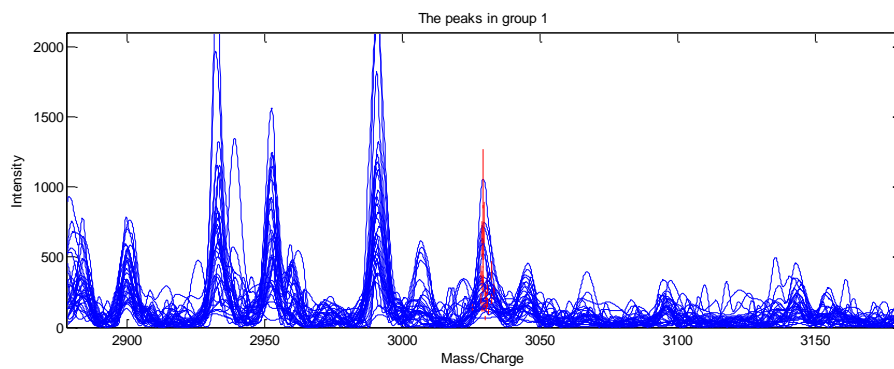

Peak figure: M/Z 3029

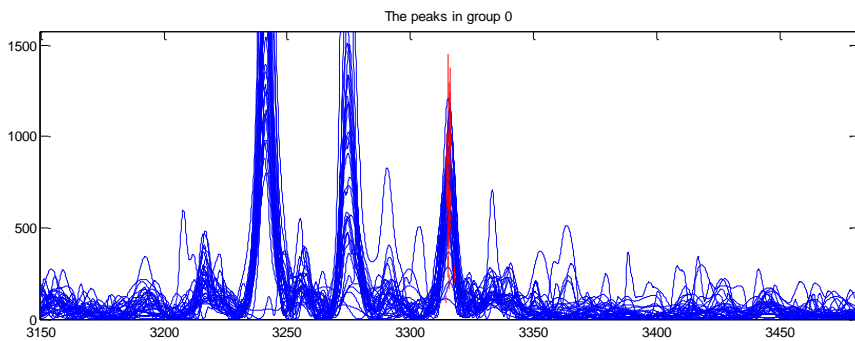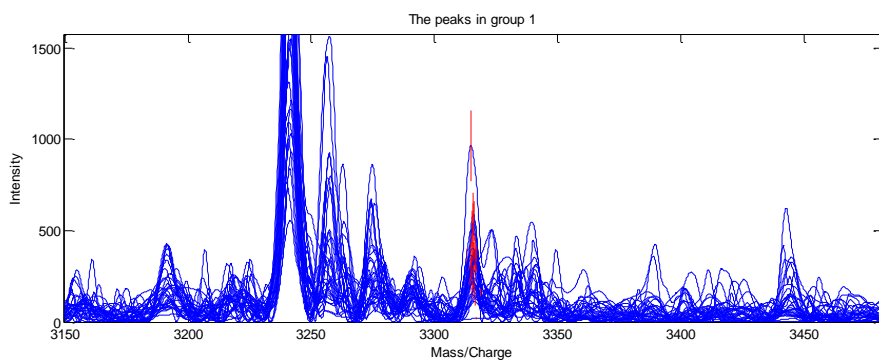

Peak figure: M/Z 3115

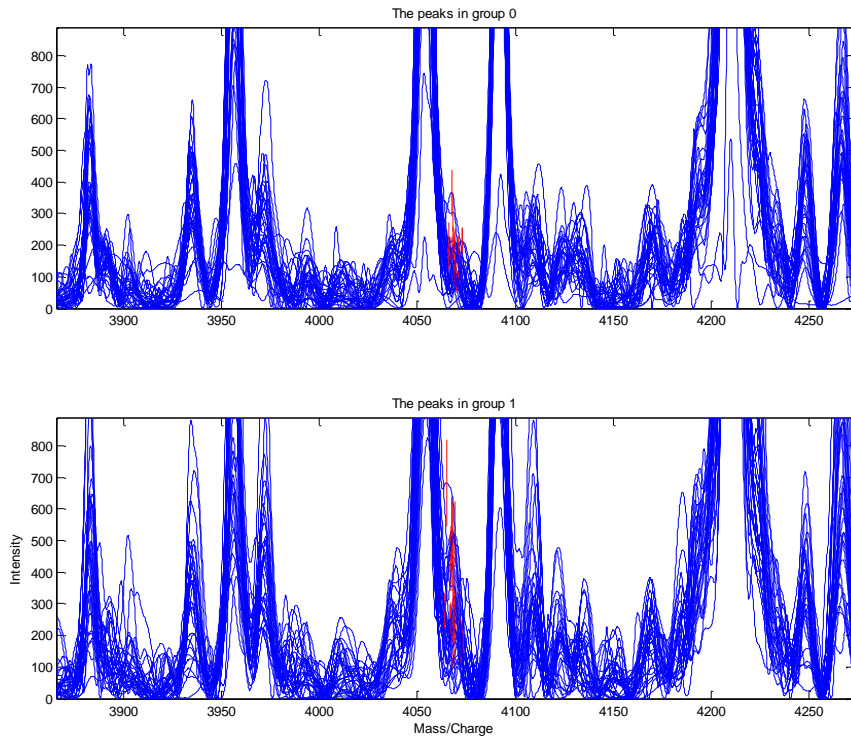

Peak figure: M/Z 4069

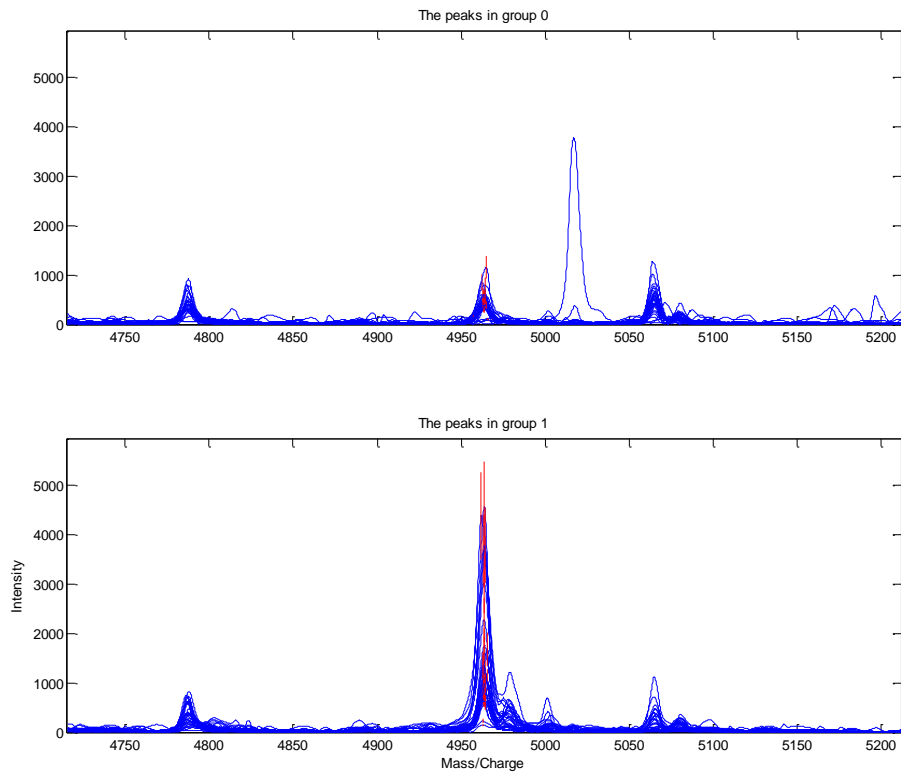

Peak figure: M/Z 4964



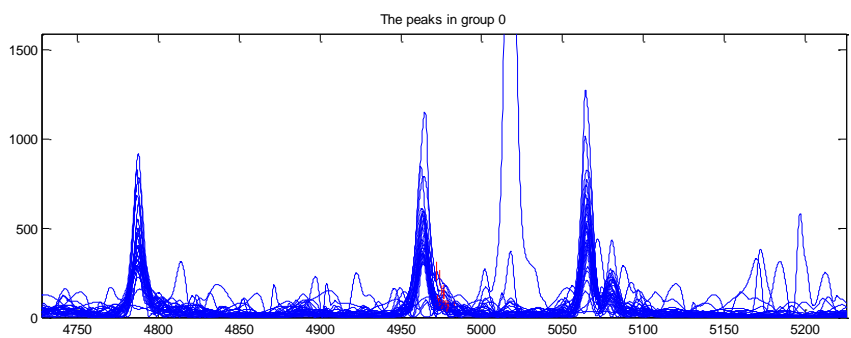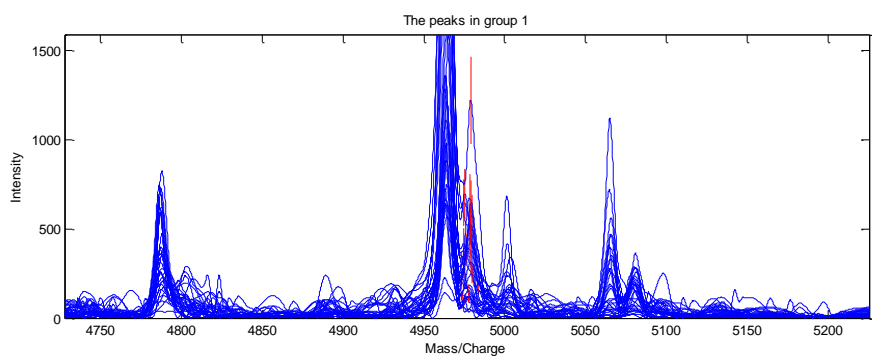

Peak figure: M/Z 4976

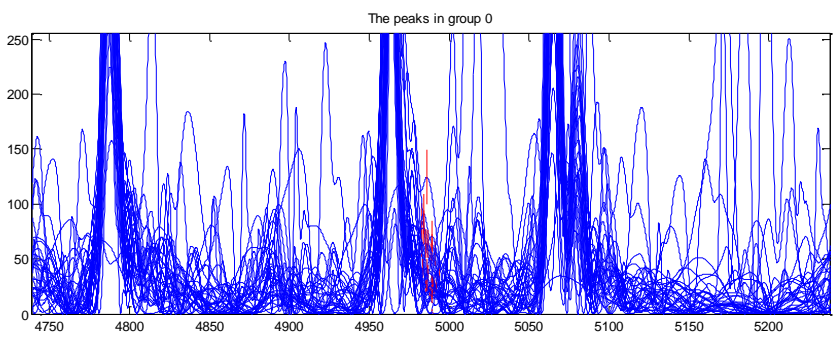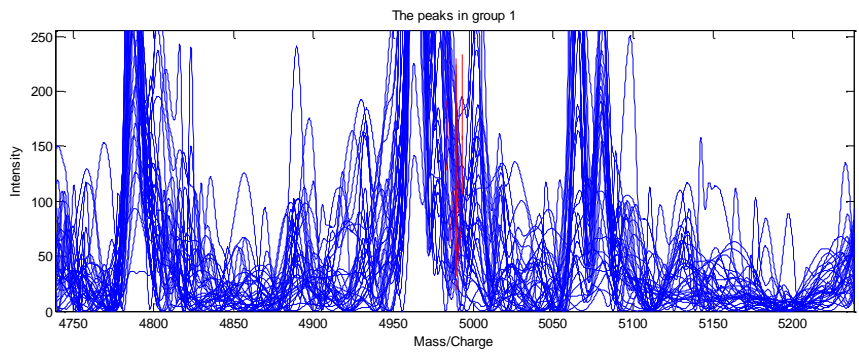

Peak figure: M/Z 4988

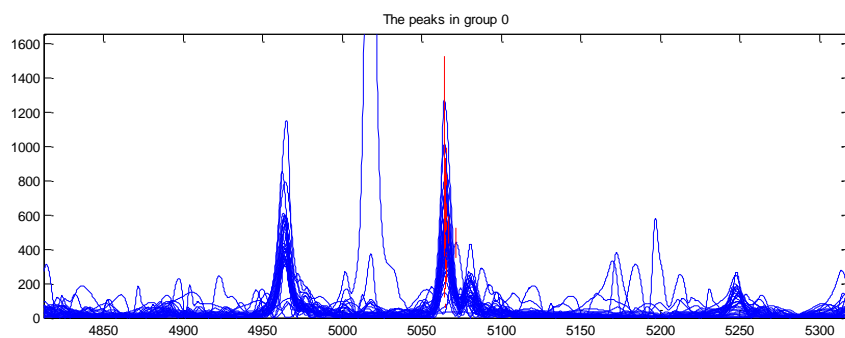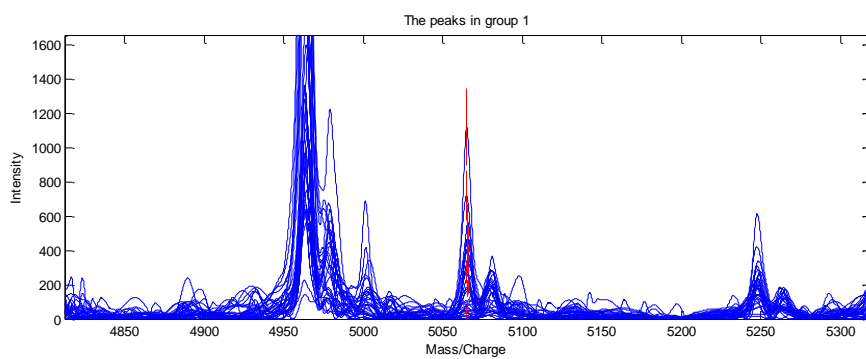

Peak figure: M/Z 5065

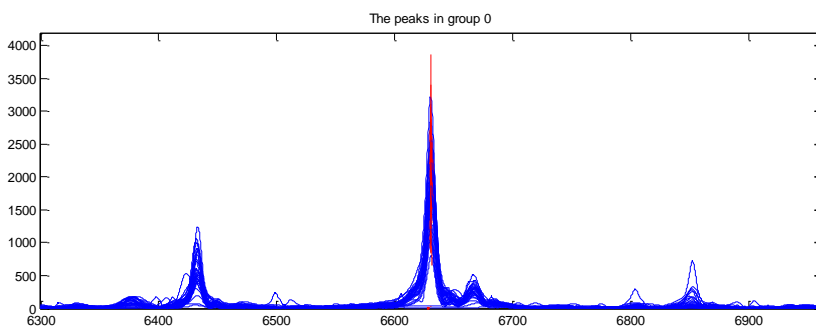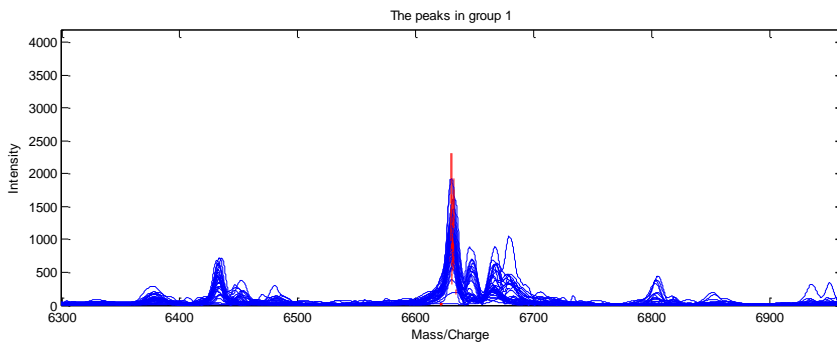

Peak figure: M/Z 6630

User Name zy2016 Peaks filtering factor Wilcoxon  
 Repeat Sample 0 Small Size Sample No  
 Test sample percent 0.3 Batch Analyze 1  
 Wavelet threshold 100 Smoothing window 100  
 Calibration coefficient (%)0.03 Minimal M/Z (%) 1000  
 Cluster factor (%) 0.003 Minimal peak threshold (%) 0.1  
 Excluded spectra threshold (%) 0.2 Minimal sinal/noise ratio (%) 2  
 Minimal intensity 300 P value or Number of peaks 10  
 Algorithm 1 Evaluation 1  
 GA population 50 GA generation 20

#### Training result

|         | Predicted Class 0 | Predicted Class 1 | Sum | Accuracy (%) | Error(%) |
|---------|-------------------|-------------------|-----|--------------|----------|
| Class 0 | 30                | 0                 | 30  | 100          | 0        |
| Class 1 | 0                 | 30                | 30  | 100          | 0        |

#### Validation result

|         | Predicted Class 0 | Predicted Class 1 | Sum | Accuracy (%) | Error (%) |
|---------|-------------------|-------------------|-----|--------------|-----------|
| Class 0 | 29                | 1                 | 30  | 96.6667      | 3.3333    |
| Class 1 | 1                 | 29                | 30  | 96.6667      | 3.3333    |

selected markers is

4964.719 3029.7033 2833.9187 2900.1248

#### Biomarker M/Z

4976.5679 4964.719 3029.7033 4988.552 3315.7248  
 2833.9187 6630.6521 4069.1778 2900.1248 5065.4939

#### P value or Weight

1.3111e-008 7.695e-008 7.043e-007 8.1975e-007 3.8349e-006  
 1.0188e-005 1.5292e-005 2.7726e-005 3.5923e-005 3.5923e-005

#### Mean in Class0

91.5586 446.2517 747.9188 42.3675 666.6498  
 50.7423 1746.3756 160.363 207.4617 505.9153

#### Mean in Class1

369.9864 1585.3402 321.625 108.3447 325.6311  
 135.6622 1019.3287 299.7414 399.2346 232.4073

#### Std in Class0

49.6683 225.4799 327.0184 28.542 275.9018

43.03 721.7627 71.6869 114.6405 262.6943

Std in Class1

252.5572 1255.3035 228.6694 51.7756 180.4535

81.0189 436.1463 151.9196 183.067 251.7712
