# Supplementary material for: Exploration of Serum Proteomic Profiling and Diagnostic Model That Differentiate Crohn's Disease and Intestinal Tuberculosis
Source: PubMed Central journal article supplement (PMC5173341; doi:10.1371/journal.pone.0167109), 2016-12-20
Supplement: pone.0167109.s003.pdf [file pone.0167109.s003.pdf]

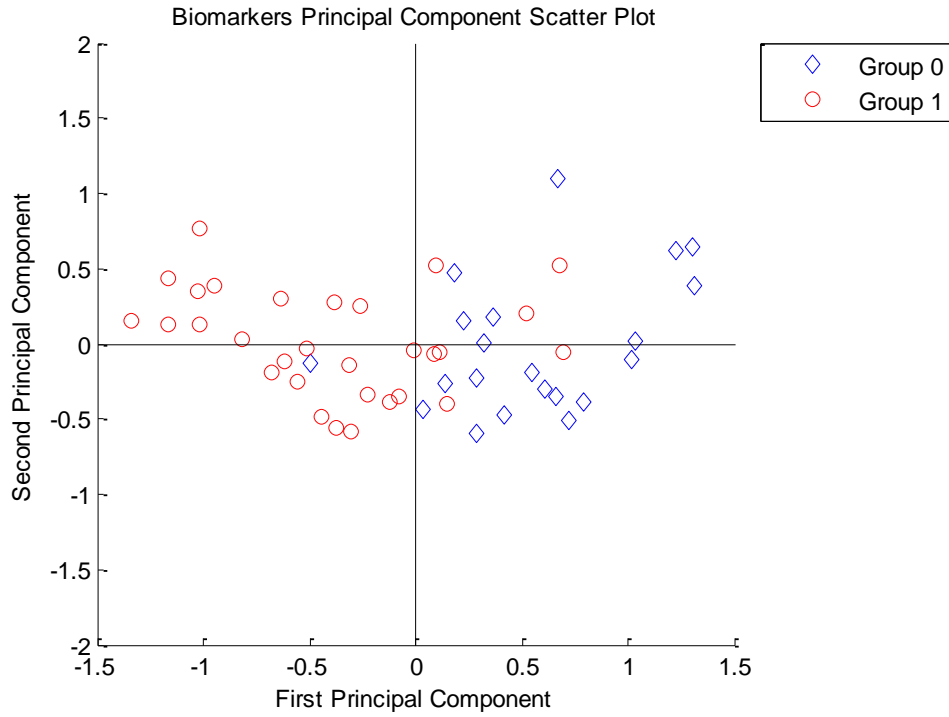

**Biomarkers Principal Component Scatter Plot**  
 Group 1: Crohn's disease patients, group 0: Intestinal tuberculosis patients

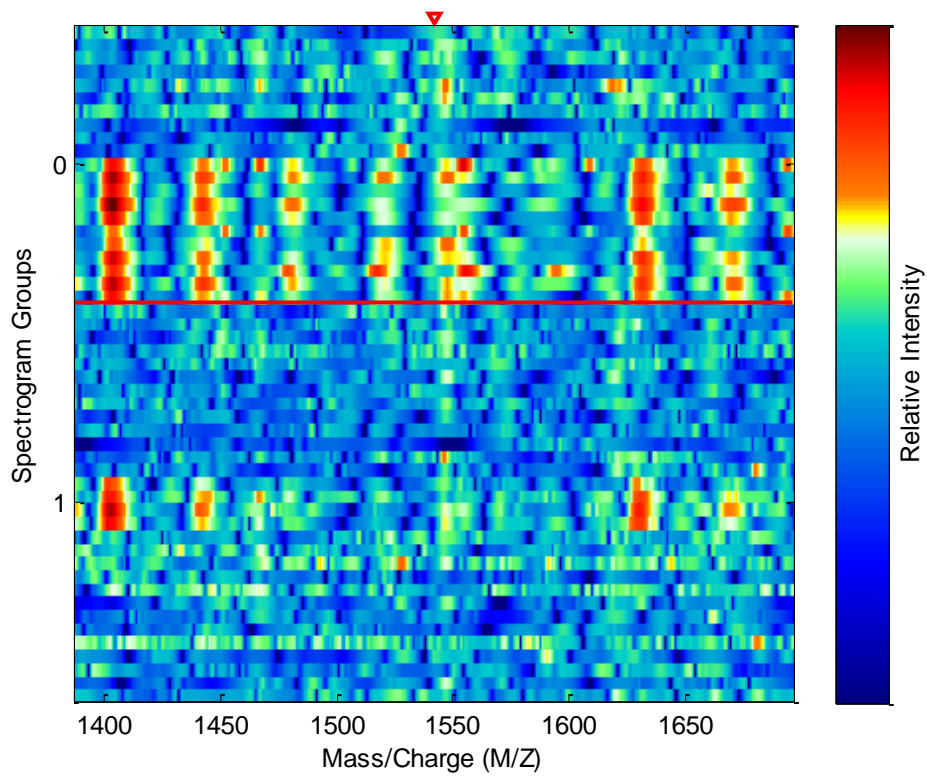

Gel figure: M/Z 1541

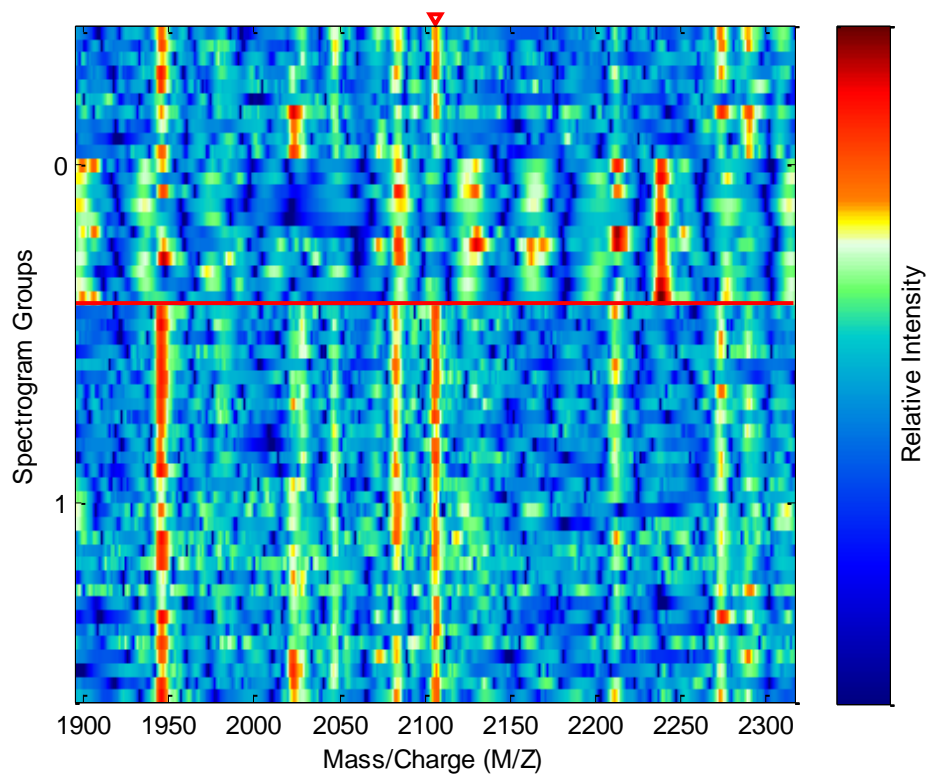

Gel figure: M/Z 2105

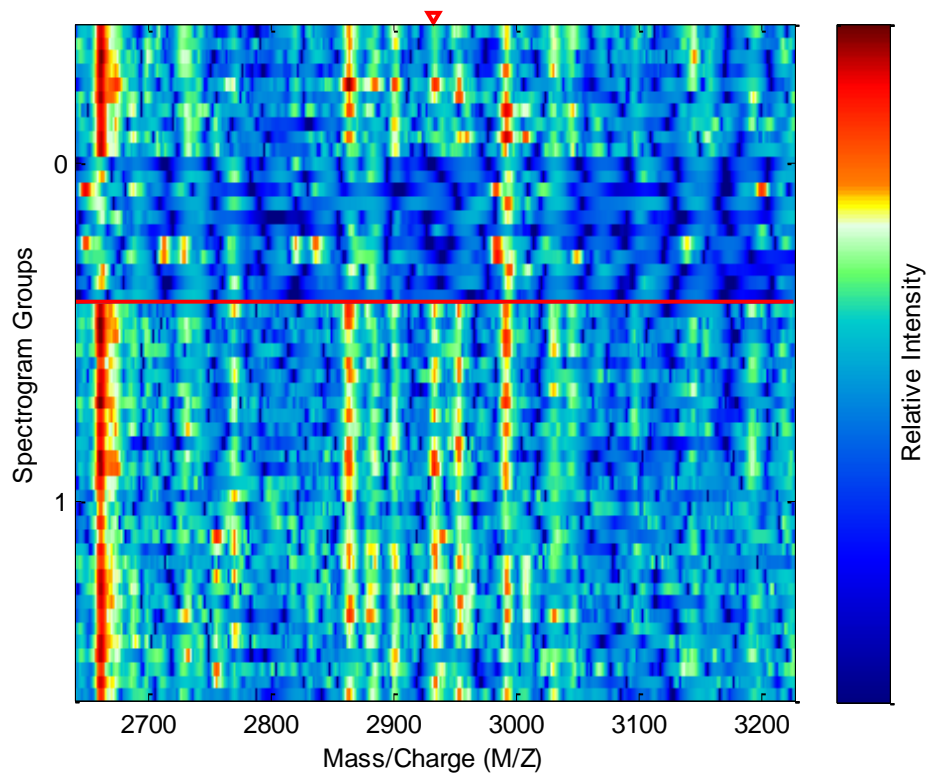

Gel figure: M/Z 2933

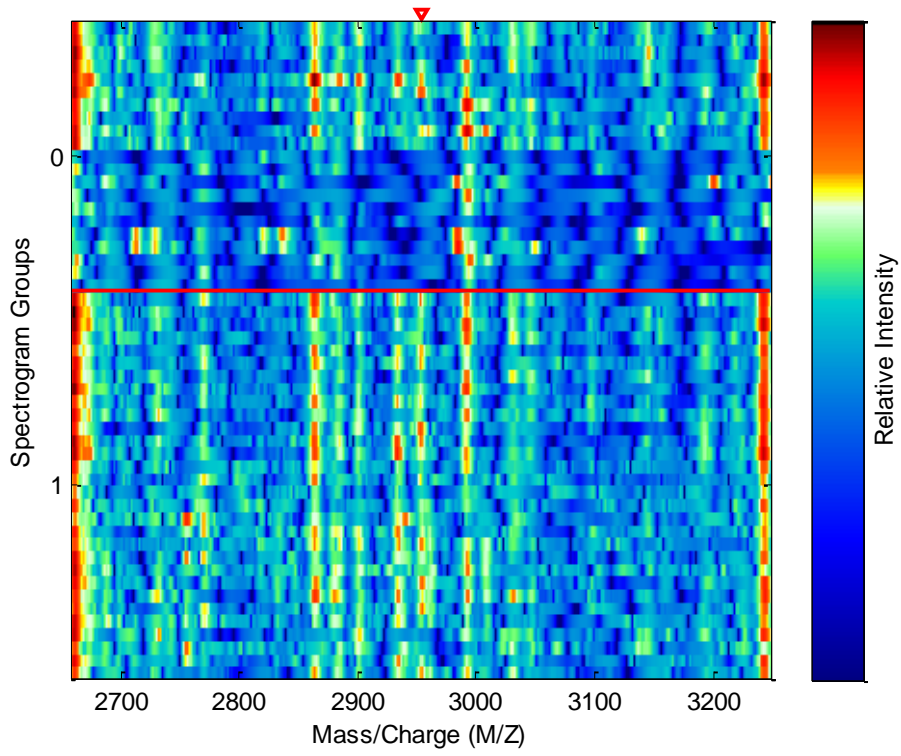

Gel figure: M/Z 2952

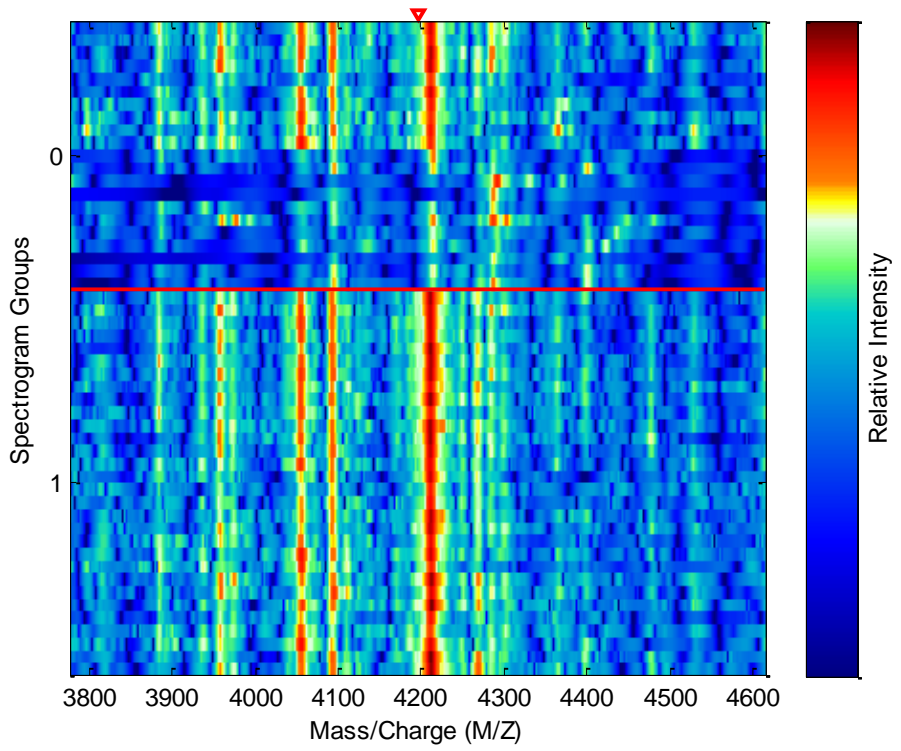

Gel figure: M/Z 4195

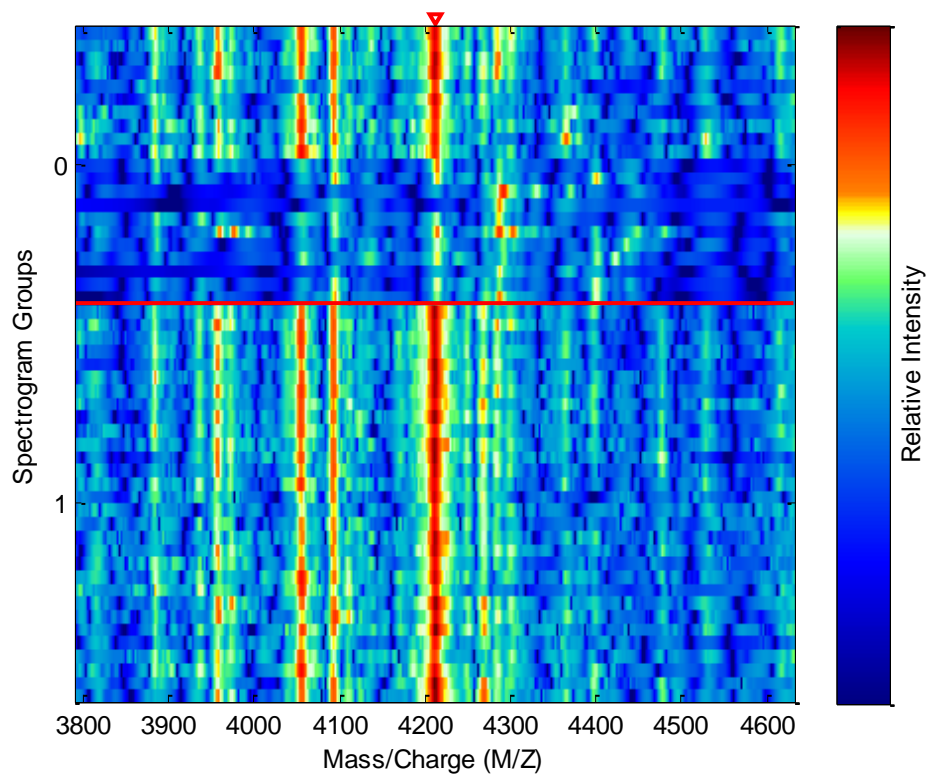

Gel figure: M/Z 4210

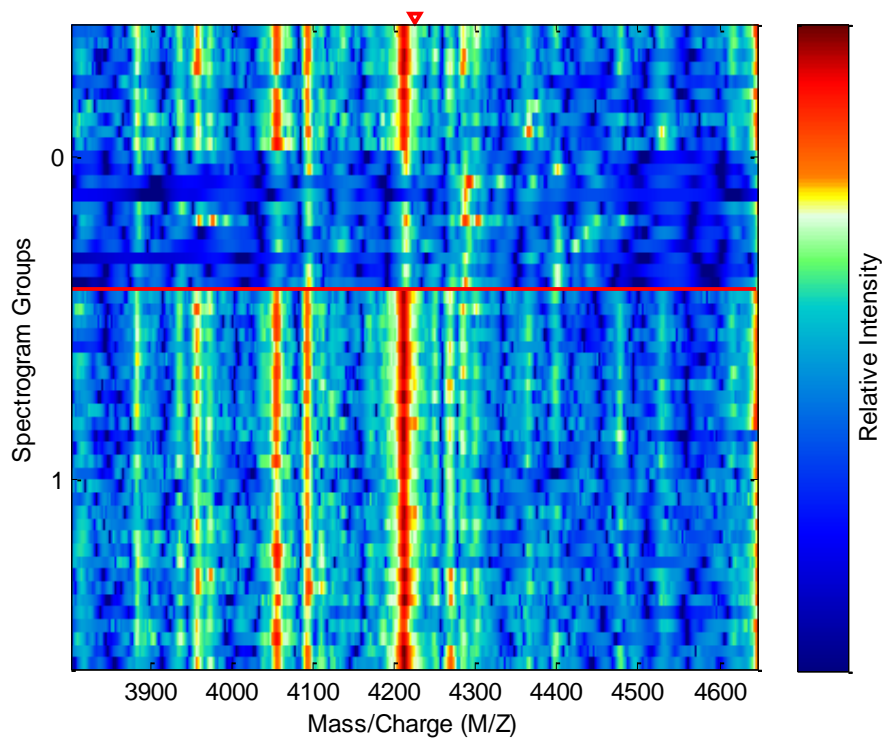

Gel figure: M/Z 4223

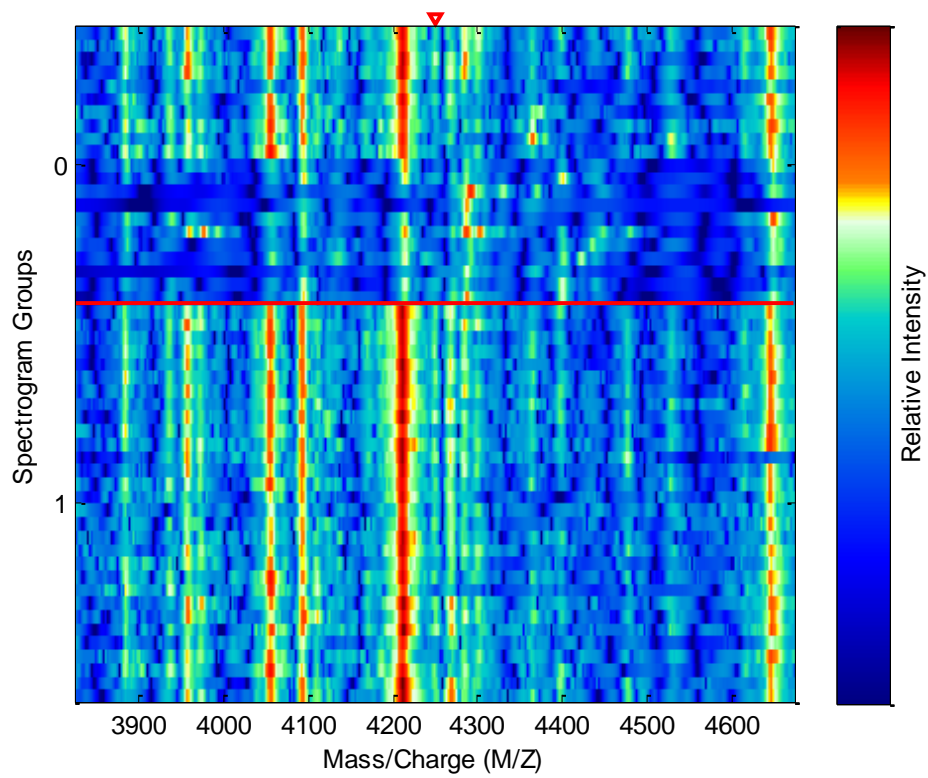

Gel figure: M/Z 4248

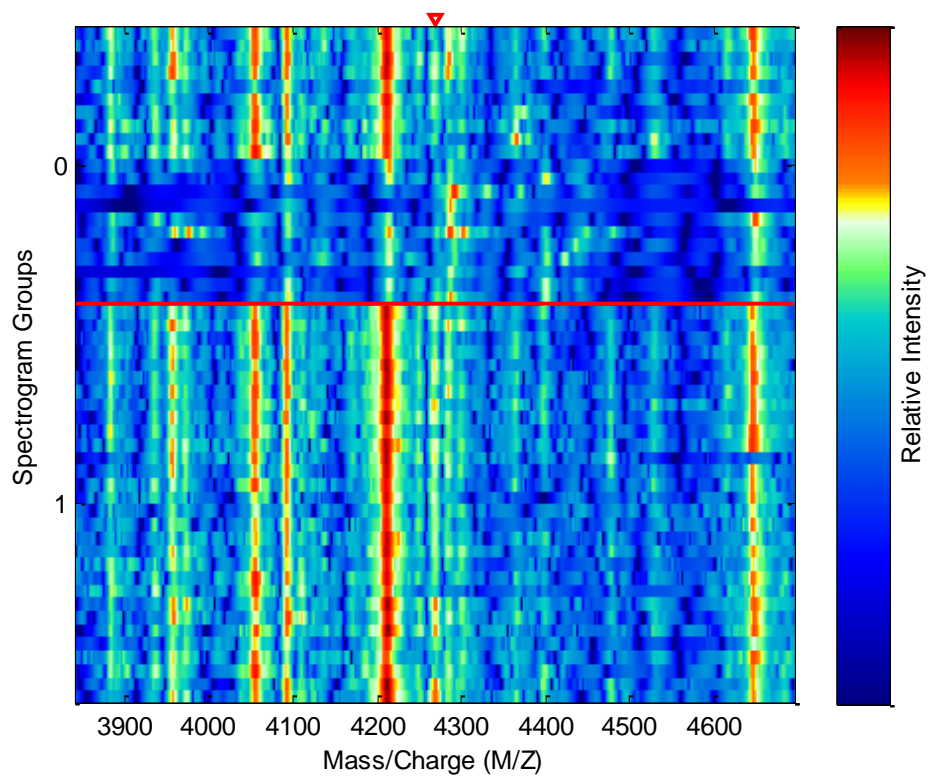

Gel figure: M/Z 4267

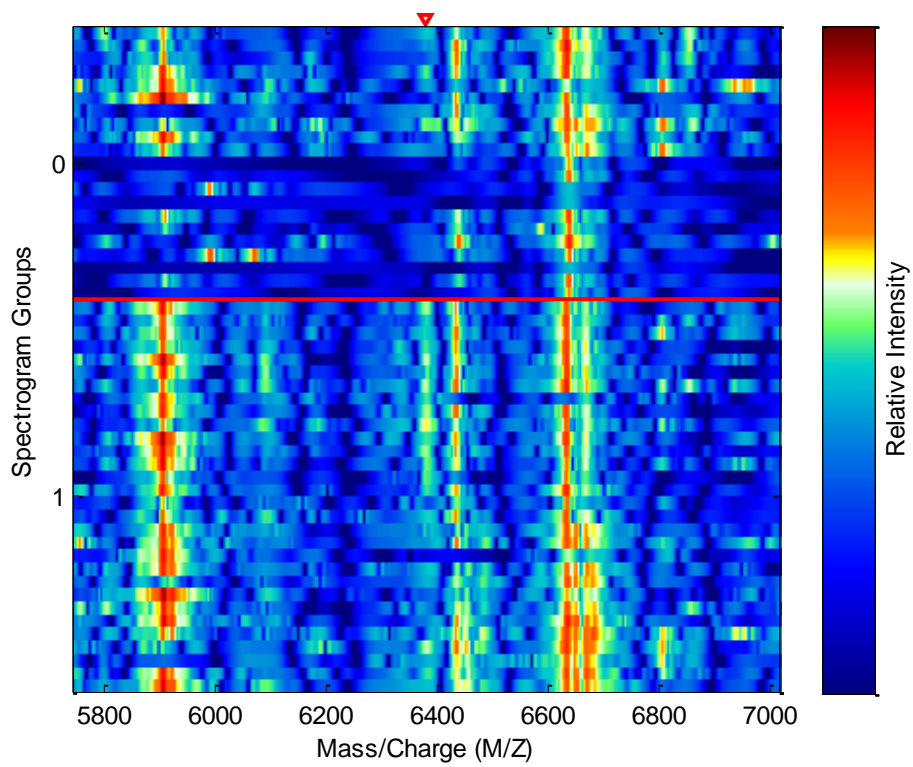

Gel figure: M/Z 6380

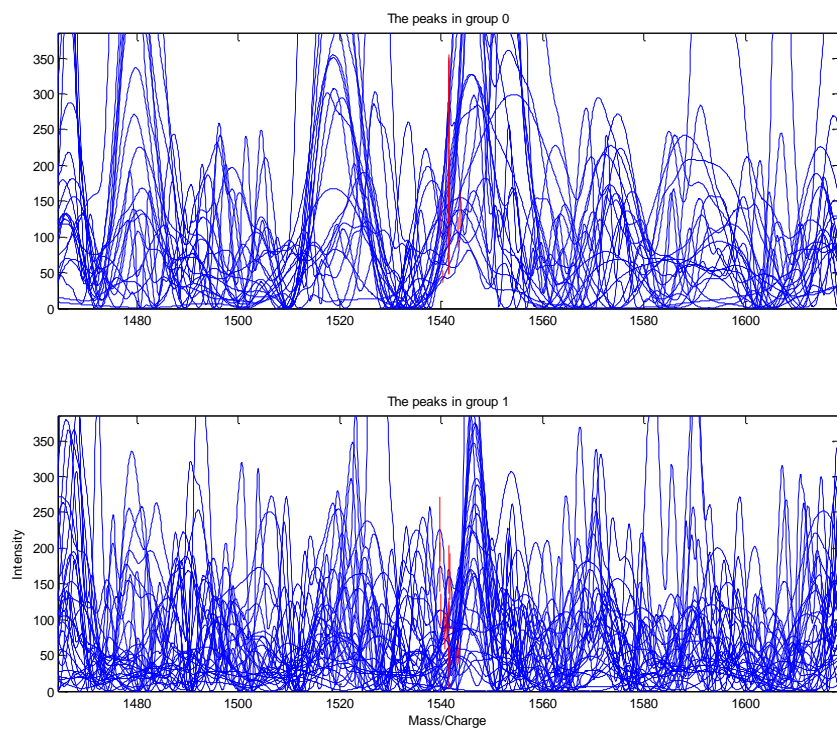

Peak figure: M/Z 1541

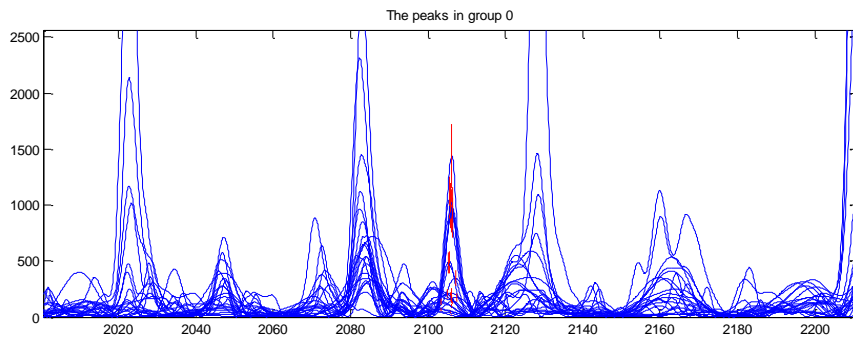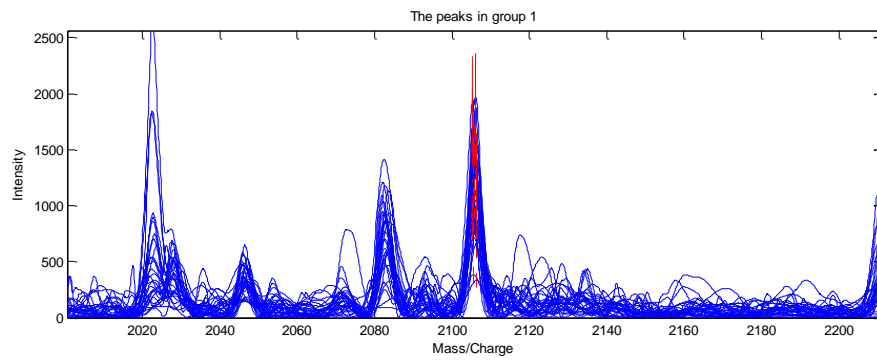

Peak figure: M/Z 2105

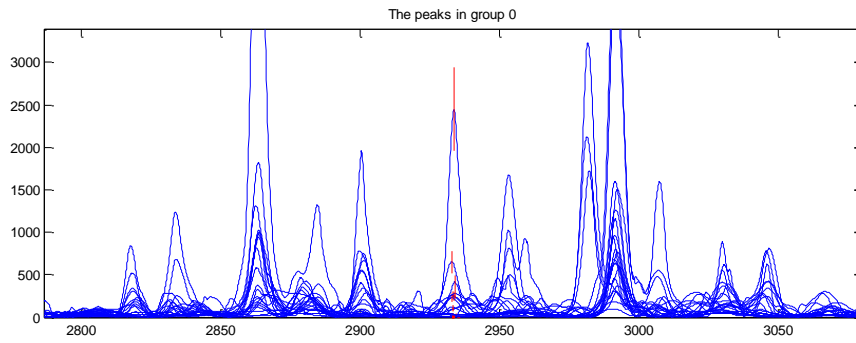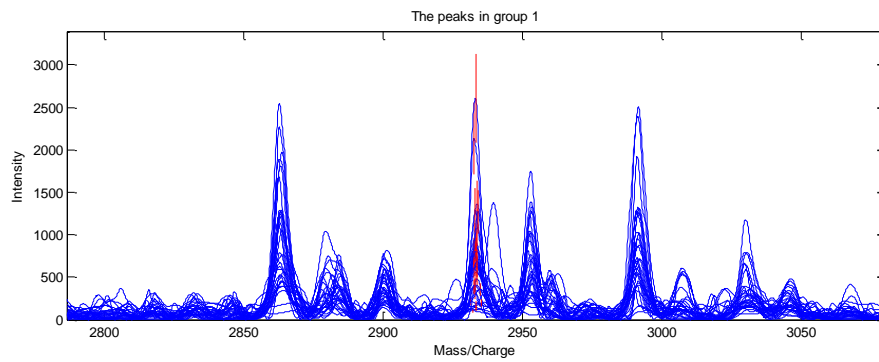

Peak figure: M/Z 2933

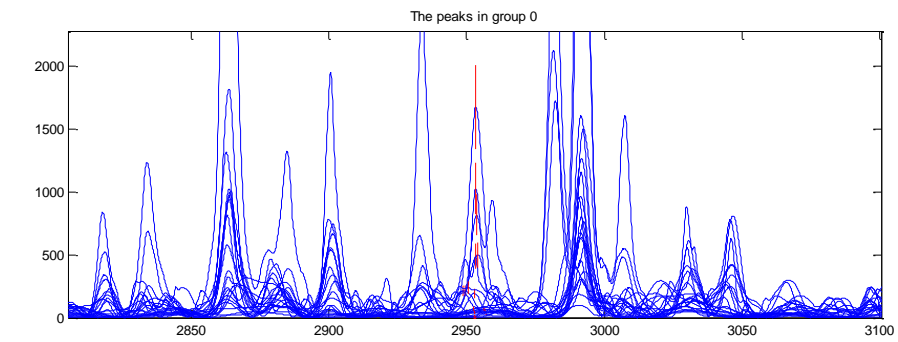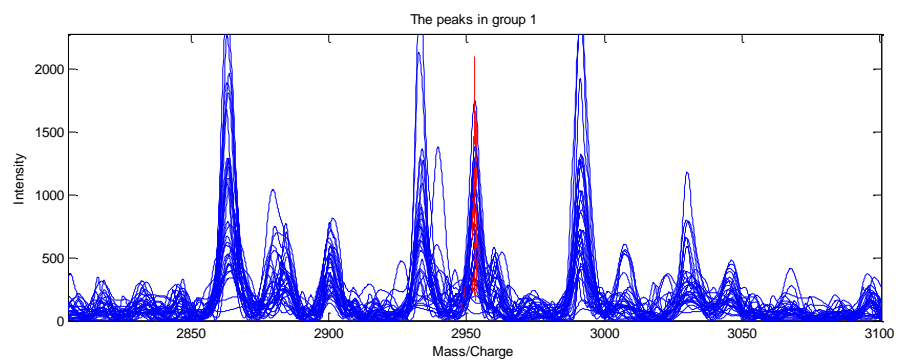

Peak figure: M/Z 2952

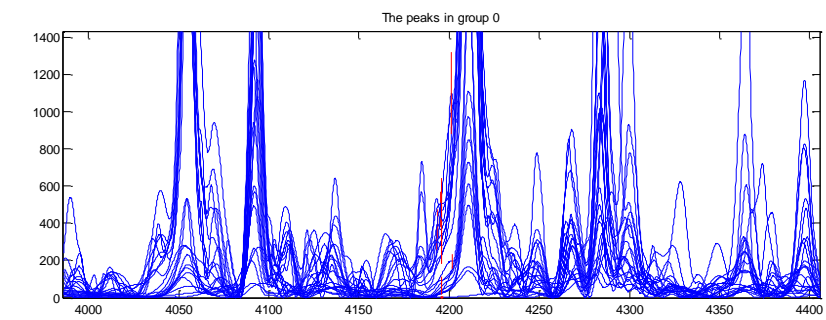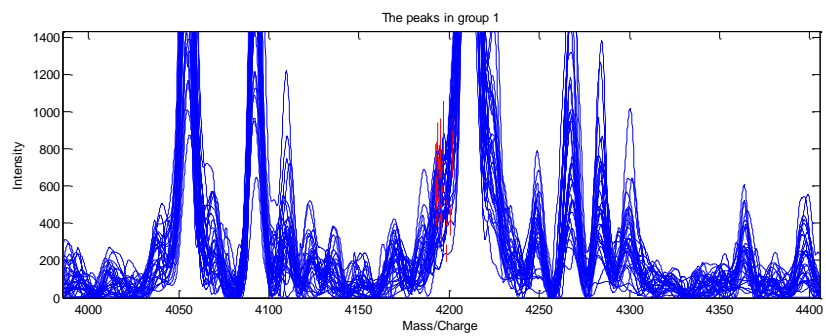

Peak figure: M/Z 4195



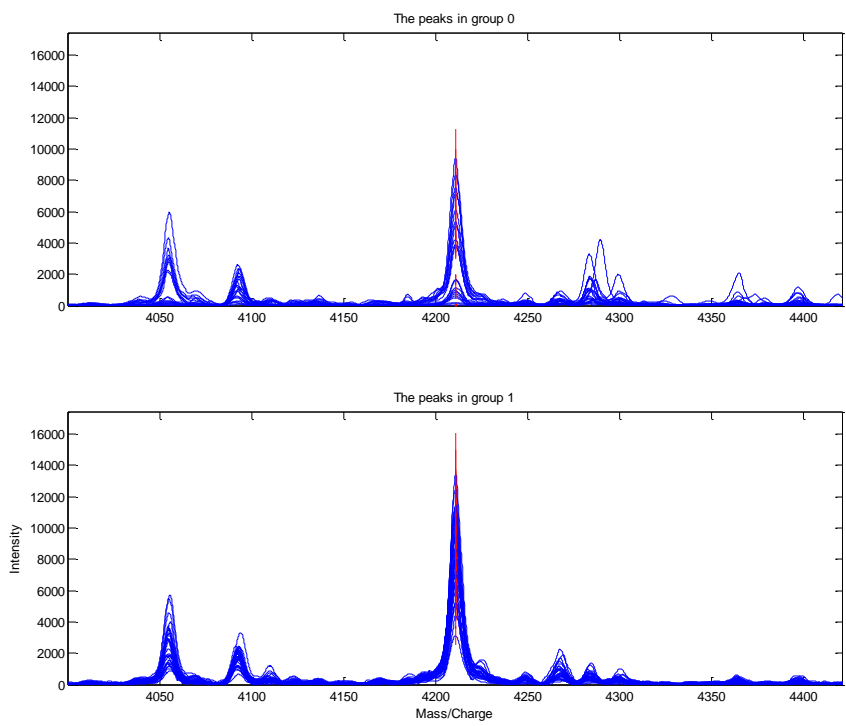

Peak figure: M/Z 4210

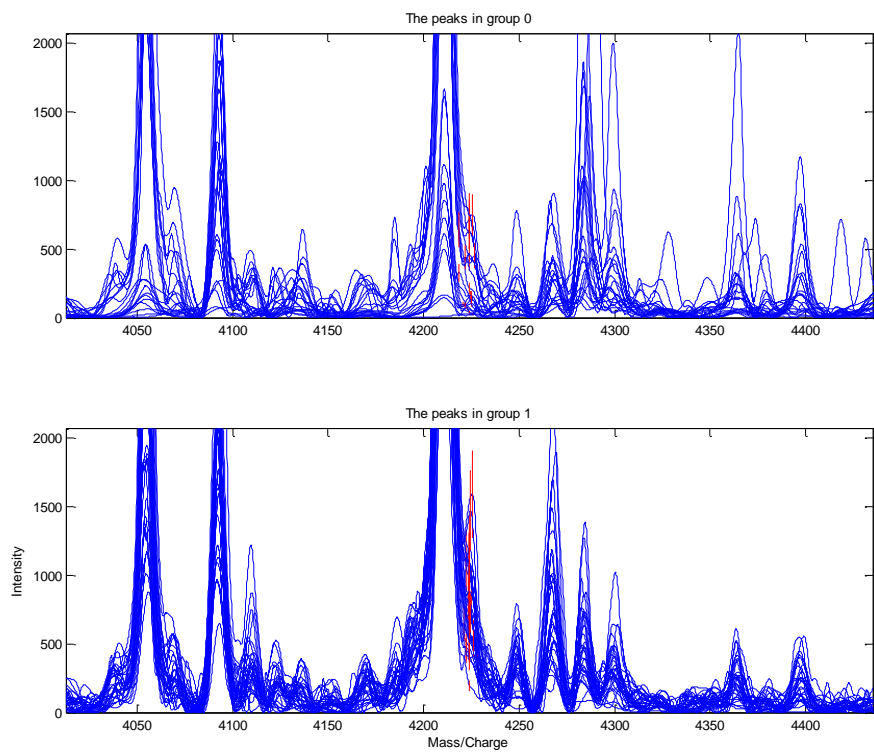

Peak figure: M/Z 4233

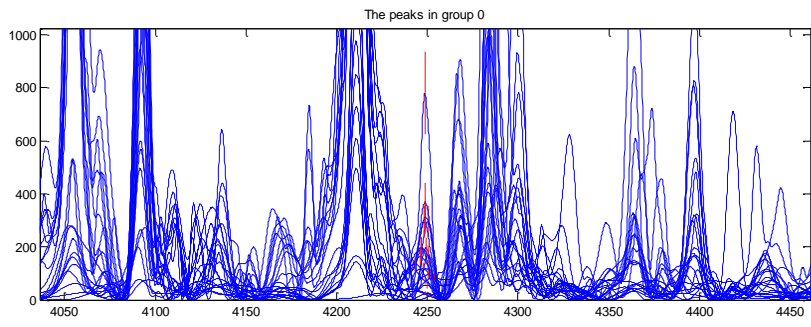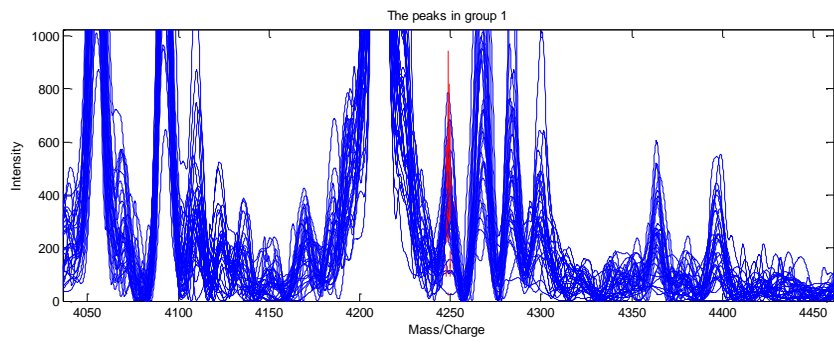

Peak figure: M/Z 4248

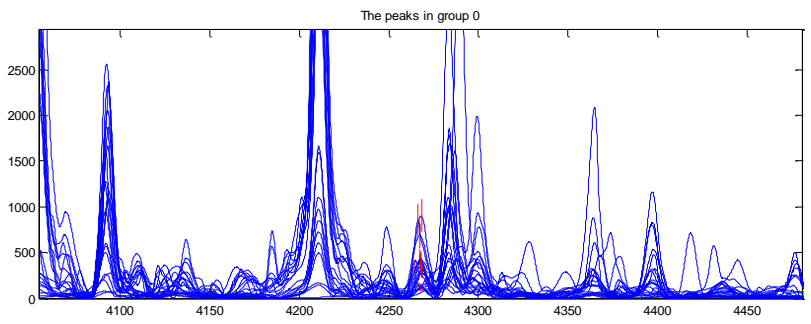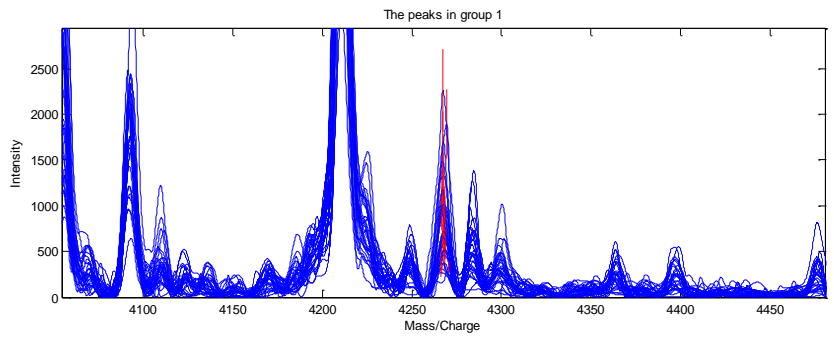

Peak figure: M/Z 4267

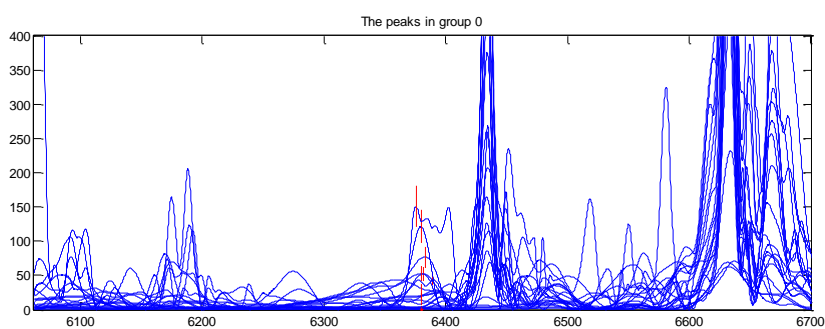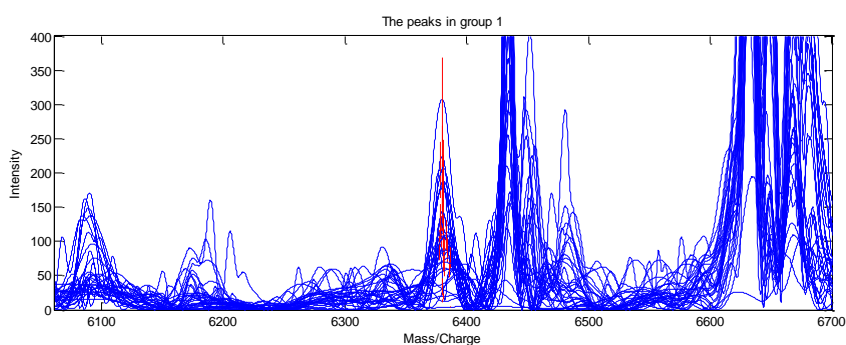

Peak figure: M/Z 6380

User Name zy2016 Peaks filtering factor Wilcoxon  
 Repeat Sample 0 Small Size Sample No  
 Test sample percent 0.3 Batch Analyze 1  
 Wavelet threshold 100 Smoothing window 100  
 Calibration coefficient (%)0.03 Minimal M/Z (%) 1000  
 Cluster factor (%) 0.003 Minimal peak threshold (%) 0.1  
 Excluded spectra threshold (%) 0.2 Minimal sinal/noise ratio (%) 2  
 Minimal intensity 300 P value or Number of peaks 10  
 Algorithm 1 Evaluation 1  
 GA population 50 GA generation 20

Training result

|         | Predicted Class 0 | Predicted Class 1 | Sum | Accuracy (%) | Error (%) |
|---------|-------------------|-------------------|-----|--------------|-----------|
| Class 0 | 18                | 3                 | 21  | 85.7143      | 14.2857   |
| Class 1 | 2                 | 28                | 30  | 93.3333      | 6.6667    |

Validation result

|         | Predicted Class 0 | Predicted Class 1 | Sum | Accuracy (%) | Error (%) |
|---------|-------------------|-------------------|-----|--------------|-----------|
| Class 0 | 16                | 5                 | 21  | 76.1905      | 23.8095   |
| Class 1 | 6                 | 24                | 30  | 80           | 20        |

selected markers is

4267.7998 4223.9247 1541.5624

Biomarker M/Z

4210.7588 4195.7477 4267.7998 2105.8038 2933.4035

4223.9247 6380.9606 2952.8616 4248.7848 1541.5624

P value or Weight

3.4639e-006 5.0034e-006 6.568e-006 7.8604e-006 7.8604e-006

1.2241e-005 1.7336e-005 6.5941e-005 7.147e-005 9.8287e-005

Mean in Class0

3291.1052 239.9033 335.8663 433.0916 237.3828

326.9949 30.1196 276.083 178.0915 153.4355

Mean in Class1

8342.1784 558.4655 853.9418 1185.5369 734.2254

787.9001 108.6418 681.8899 382.4116 .3677

Std in Class0

3046.6524 265.5924 234.2178 428.4893 533.9402

266.3362 41.3966 425.8328 172.3976 77.424

Std in Class1

2548.3934 159.1813 489.673 417.3648 572.2113

329.382 72.4131 416.5696 173.1632 56.1958
